# Supplementary material
Source: publisher figshare collection journal article supplement (https://tandf.figshare.com/ndownloader/files/22818014)
Supplement: Supplementary file 1 [file 22818014]

**Biosynthetic pathways and** **metabolic engineering of aroma and pungent compounds from spice plants**

**Supporting Information**

Linhua Huang1, 2, Chi-Tang Ho3, **, Yu Wang2, *

1Citrus Research Institute, Southwest University, Xiema, Beibei, Chongqing 400712, China

2Citrus Research and Education Center, University of Florida, 700 Experiment Station Road, Lake Alfred, Florida 33850, USA

3Department of Food Science, Rutgers University, 65 Dudley Rd., New Brunswick, NJ 08901, USA

*Corresponding Author:

Email address: [yu.wang@ufl.edu](mailto:yu.wang@ufl.edu)

**Co-corresponding Author:

Email address: [ctho@sebs.rutgers.edu](mailto:ctho@sebs.rutgers.edu)

**Table S1**

The literature information of volatile compounds profiling on spice plants surveyed in the present study. The composition of each aroma compound was collected and normalized into the percentage of the concentration from volatile compounds or essential oils.

| Name | Part | Species name | Family | Sampling | GC/MS Column | References |
| --- | --- | --- | --- | --- | --- | --- |
| Leek | white part of the leek stem | *Allium ampeloprasum* Var. Bulga | *Allioideae* | Dynamic Headspace Collection | DB Wax | (Nielsen & Poll, 2004) |
| Rakkyo | leaves | *Allium chinense G. Don* | *Allioideae* | simultaneous steam distillation | DB-1 fused silica capillary column | (Pino, Fuentes, & Correa, 2001) |
| Chive | leaves | *Allium tuberosum Rottl. ex Sprengel* | *Allioideae* |
| Garlic | bulbs | *Allium sativum L.* | *Allioideae* | SPME | DB-5ms | (Kim, Park, Jang, & Lee, 2011) |
| Cilantro | leaves | *Coriandrum sativum L.* | *Apiaceae* | Distillation | HP-5 fused silica capillary column | (Potter, 1996) |
| Cerely | seed | *Apium graveolens L. (cv.* | *Apiaceae* | SPME | HP-5 capillary column (30 | (Organica et al., 2004) |
| Caraway | seed | *Carum carvi L.* | *Apiaceae* | Microwave assistant | DB-1 | (Chemat, Aït-Amar, Lagha, & Esveld, 2005) |
| Anise | seed | *Pimpinella anisum L.* | *Apiaceae* | Hydrodistillation | Perkin Elmer Elite-5MS capillary column | (G. Singh, Kapoor, Singh, Heluani, & Catalan, 2008) |
| Fennel | seed | *Foeniculum vulgare Mill.* | *Apiaceae* | Simultaneous distillation-extraction (SDE) | SPB-1 (Supelco) methyl silicone column | (Idalgo, 2005) |
| Bunium persicum | seed | *Bunium persicum* | *Apiaceae* | Hydrodistillation | DB-5 | (Oroojalian, Kasra-Kermanshahi, Azizi, & Bassami, 2010) |
| Cumin | seed | *Cuminum cyminum* | *Apiaceae* |
| Carum copticum | seed | *Carum copticum* | *Apiaceae* |
| Dill | seed | *Anethum graveolens L.* | *Apiaceae* | Water distillation | FSOT-RSL-200 or FS-HYDRODEX-β-PM fused silica column | (Jirovetz, Buchbauer, Stoyanova, Georgiev, & Damianova, 2003) |
| Coriander | seed | *Coriandrum sativum L.* | *Apiaceae* | Hydrodistillation | DB-5 | (Bhuiyan, Begum, & Sultana, 2009) |
| Basil | leaves | *Ocimum basilicum L.* | *Lamiaceae* | Hydrodistillation | HP-20M column | (Politeo, Jukic, & Milos, 2006) |
| Thyme | leaves | *Thymus vulgaris L.* | *Lamiaceae* | Simultaneous distillation-extraction (SDE) | SPB-1 (Supelco) methyl silicone column | (Idalgo, 2005) |
| Savory | Aeiral | *Satureja montana L.* | *Lamiaceae* | Hydrodistillation | CP Sil 8 CB capillary column | (Bezić, Šamanić, Dunkić, Besendorfer, & Puizina, 2009) |
| Majoran | Fresh flower | *Origanum majorana L.* | *Lamiaceae* | Hydrodistillation | BP-1fused silica capillary colum | (Vera & Chane-Ming, 1999) |
| Rosemary | Plants | *Rosmarinus officinalis L.* | *Lamiaceae* | Hydrodistillation | TRACE TR-5 | (Szumny, Figiel, Gutiérrez-Ortíz, & Carbonell-Barrachina, 2010) |
| Oregano | Plants | *Origanum vulgare* | *Lamiaceae* | Hydrodistillation | TRACE TR-5 | (Figiel, Szumny, Gutiérrez-Ortíz, & Carbonell-Barrachina, 2010) |
| Sage | aerial | *Salvia officinalis L.* | *Lamiaceae* | Hydrodistillation | DB-5MS | (Bouaziz, Yangui, Sayadi, & Dhouib, 2009) |
| Cinnamon | bark | *Cinnamomum altissimum Kosterm* | *Lauraceae* | Hydrodistillation | HP-5MS UI fused-silica capillary column | (Abdelwahab et al., 2017) |
| Bay | leaves | *Laurus nobilis L. leaves* | *Lauraceae* | Hydrodistillation | HP-5MS capillary column | (Sellami et al., 2011) |
| Allspice | fruit | *Pimenta dioica Lindl* | *Myrtaceae* | Hydrodistillation | VF-1 ms column | (Monteiro et al., 2011) |
| Clove | bud | *Eugenia caryophyllata Thun.* | *Myrtaceae* | Supercritical fluid extraction | DB-5 | (Della Porta, Taddeo, D’Urso, & Reverchon, 1998) |
| White pepper | berry | *Piper nigrum* L. | *Piperaceae* | Hydrodistillation | Perkins Elmer Elite-5MS capillary column | (S. Singh et al., 2013) |
| Black pepper | seed | *Piper nigrum* L. | *Piperaceae* | Hydrodistillation, SPME | RSL-200 or HP-5MS | (Jirovetz, Buchbauer, Ngassoum, & Geissler, 2002) |
| Ashanti pepper (black) | seed | *Piper guineense* | *Piperaceae* | Hydrodistillation, SPME |
| Ashanti pepper (white). | seed | *Piper guineense* | *Piperaceae* | Hydrodistillation, SPME |
| Orange | juice | *Citrus sinensis* | *Ruteceae* | Hydrodistillation | DB-wax | (Högnadóttir & Rouseff, 2003) |
| Japenese peper | fruit | *Xanthoxylum piperitum DC.* | *Ruteceae* | Methanol extraction | DB-wax | (Jiang & Kubota, 2004) |
| Sichuan pepper | seed | *Zanthoxylum bungeanum Maxim* | *Ruteceae* | Hydrodistillation | DB-5 | (X. Yang, 2008) |
| Star anise | fruit | *Illicium verum Hooker fil* | *Schisandraceae* | Supercritical fluid extraction | DB-5 | (Della Porta et al., 1998) |
| Turmeric | rhizome | *Curcuma longa Linn.* | *Zingiberaceae* | Hydro distillation | Elite-  1 fused silica column | (Kutti Gounder & Lingamallu, 2012) |
| Cardamom | fruit | *Elettaria cardamomum (L.)* | *Zingiberaceae* | Hydrodistilled | a fused silica column Ulbon HR-1 | (Husain & Ali, 2014) |
| Ginger | rhizome | *Zingiber officinale Rosc. (Zingiberaceae),* | *Zingiberaceae* | HS-SPME: | DB - 5 | (Z. Yang et al., 2009) |

**Table S2**

Enzymes or genes involved in the metabolic engineering biosynthesis of spice flavor compounds.

| Compound type | Flavor compound | Enzyme | Gene | Reference |
| --- | --- | --- | --- | --- |
| Terpene | (+)-Valencene | Terpene synthase CsTPS1 | *CitAP2.10* | Chang et al. 2007 |
| *S*-Linalool | *S*-linalool  synthase (*LIS*) | *S-linalool*  *synthase (LIS) gene* | Lewinsohn et al. 2001 |
| Linalool | Linalool synthases | *CuSTS3-1, CuSTS3-2* | Shimada et al. 2014 |
| Nerolidol/linaloolsynthase | *CuSTS4* |
| Bisabolene | Bisabolene synthases | *ZoTps1* | Fujisawa et al. 2010 |
| Phenylpropanoid | Eugenol | Eugenol synthase |  | Ferrer et al. 2008 |
| Estragole, methyl eugenol | *O*-methyltransferase |  | Lewinsohn et al. 2000 |
| Eugenol, isoeugenol | Eugenol/isoeugenol synthase | *EGS1, IGS1* | Koeduka et al. 2006 |
| Cinnamic acid,p-coumaric acid, caffeic acid, and ferulicacid | Phenylalanine ammonia-lyase, tyrosine ammonia-lyase, 4-coumarate: CoA ligase, stilbene synthase, 4-coumarate 3-hydroxylase, caffeic acid 3-O-methyltrans-ferase, and aflavin-dependent halogenase | *PAL, TAL, 4CL, STS, C3H, COMT, Rdc2* | Wang et al. 2015 |
| Sulfocompound | Cysteine | Cysteine synthase |  | Urano et al. 2000 |
| *O*-Acetylserine | Serine acetyltransferase |  |
| γ-Glutamyl peptide | γ-Glutamyl transpeptidase |  | Shaw et al. 2005 |
| Allicin | Alliinase |  | Thomson et al. 2013 |
| trans-S-1-propenyl-L-cysteine  sulfoxide | Lachrymatory factor synthase |  | Oa et al. 2008 |
| Pungent compounds | Curcuminoids | Curcuminoid synthase |  | Ramirez-Ahumada et al. 2006 |
| Gingerol | Hydroxycinnamoyl-CoA thioesterases |  |
| Capsaicin | Capsaicin synthase | *Csy1* | Narasimha Prasad et al. 2006 |

**References**

Abdelwahab, S.I., A.A. Mariod, M.M.E. Taha, F.Q. Zaman, A.H.A. Abdelmageed, S. Khamis, Y. Sivasothy, and K. Awang. 2017. Chemical composition and antioxidant properties of the essential oil of *cinnamomum altissimum* kosterm.(*Lauraceae*). *Arabian Journal of Chemistry* 10(1): 131–135. http://dx.doi.org/10.1016/j.arabjc.2014.02.001.

Bezić, N., I. Šamanić, V. Dunkić, V. Besendorfer, and J. Puizina. 2009. Essential oil composition and internal transcribed spacer (its) sequence variability of four south-croatian *satureja* species (*Lamiaceae*). *Molecules* 14(3): 925–938. doi: 10.3390/molecules14030925

Bhuiyan, M.N.I., J. Begum, and M. Sultana. 2009. Chemical composition of leaf and seed essential oil of *Coriandrum Sativum* L. from Bangladesh. *Bangladesh Journal of Pharmacology* 4(2): 150–153. doi: 10.3329/bjp.v4i2.2800

Bouaziz, M., T. Yangui, S. Sayadi, and A. Dhouib. 2009. Disinfectant properties of essential oils from *Salvia Officinalis* L. cultivated in Tunisia. *Food and Chemical Toxicology* 47(11): 2755–2760. <http://dx.doi.org/10.1016/j.fct.2009.08.005>.

Chang, M.C.Y., R.A. Eachus, W. Trieu, D.K. Ro, and J.D. Keasling. 2007. Engineering *Escherichia Coli* for production of functionalized terpenoids using plant P450s. *Nature Chemical Biology* 3(5): 274–277. doi: 10.1038/nchembio875

Chemat, S., H. Aït-Amar, A. Lagha, and D.C. Esveld. 2005. Microwave-assisted extraction kinetics of terpenes from caraway seeds. *Chemical Engineering and Processing: Process Intensification* 44(12): 1320–1326. https://doi.org/10.1016/j.cep.2005.03.011

Della Porta, G., Taddeo, R., D’Urso, E., & Reverchon, E. (1998). Isolation of clove bud and star anise essential oil by supercritical CO2extraction. *LWT - Food Science and Technology*, *31* (5):454–460. doi:10.1006/fstl.1998.0381

Ferrer, J.L., M.B. Austin, C. Stewart, and J.P. Noel. 2008. Structure and function of enzymes involved in the biosynthesis of phenylpropanoids. *Plant Physiology and Biochemistry* 46(3): 356–370. doi: 10.1016/j.plaphy.2007.12.009

Figiel, A., A. Szumny, A. Gutiérrez-Ortíz, and Á.A. Carbonell-Barrachina. 2010. Composition of oregano essential oil (*Origanum Vulgare*) as affected by drying method. *Journal of Food Engineering* 98(2): 240–247. http://dx.doi.org/10.1016/j.jfoodeng.2010.01.002.

Fujisawa, M., H. Harada, H. Kenmoku, S. Mizutani, and N. Misawa. 2010. Cloning and characterization of a novel gene that encodes (s)-β-bisabolene synthase from ginger, *Zingiber officinale*. *Planta* 232(1): 121–130. doi: 10.1007/s00425-010-1137-6

Högnadóttir, Á., and R.L. Rouseff. 2003. Identification of aroma active compounds in orange essence oil using gas chromatography-olfactometry and gas chromatography-mass spectrometry. *Journal of Chromatography A* 998(1–2): 201–211. https://doi.org/10.1016/S0021-9673(03)00524-7

Husain, S.S., and M. Ali. 2014. Analysis of volatile oil of the fruits of *Elettaria Cardamomum* (L) maton and its antimicrobial activity. *World J of Pharmacy and Pharmaceutical Science* 3(2): 1798–1808.

Idalgo, Ä.A.Z.A.H. 2005. Volatile components and key odorants of fennel ( *Feniculum Vulgare* Mill.) and Thyme (*Thymus Vulgaris* L.) oil extracts obtained by simultaneous distillation − extraction and supercritical fluid extraction. *Journal of Agricultural and Food Chemistry*no. 53: 5385–5389. doi: 10.1021/jf050340+

Jiang, L., and K. Kubota. 2004. Differences in the volatile components and their odor characteristics of green and ripe fruits and dried pericarp of Japanese pepper (*Xanthoxylum Piperitum* DC.). *Journal of Agricultural and Food Chemistry* 52(13): 4197–4203. doi: 10.1021/jf030663a

Jirovetz, L., G. Buchbauer, M.B. Ngassoum, and M. Geissler. 2002. Aroma compound analysis of *Piper Nigrum* and *Piper Guineense* essential oils from cameroon using solid-phase microextraction-gas chromatography, solid-phase microextraction-gas chromatography-mass spectrometry and olfactometry. *Journal of Chromatography A* 976(1–2): 265–275. https://doi.org/10.1016/S0021-9673(02)00376-X

Jirovetz, L., G. Buchbauer, A.S. Stoyanova, E. V. Georgiev, and S.T. Damianova. 2003. Composition, quality control, and antimicrobial activity of the essential oil of long-time stored dill ( *Anethum Graveolens* L.) seeds from Bulgaria. *Journal of Agricultural and Food Chemistry* 51(13): 3854–3857. http://pubs.acs.org/doi/abs/10.1021/jf030004y.

Kim, N.Y., M.H. Park, E.Y. Jang, and J. Lee. 2011. Volatile distribution in garlic (*Allium Sativum* L.) by solid phase microextraction (SPME) with different processing conditions. *Food Science and Biotechnology* 20(3): 775–782. doi: 10.1007/s10068-011-0108-4

Koeduka, T. 2018. Functional evolution of biosynthetic enzymes that produce plant volatiles. *Bioscience, Biotechnology and Biochemistry* 82(2): 192–199. https://doi.org/10.1080/09168451.2017.1422968.

Kutti Gounder, D., and J. Lingamallu. 2012. Comparison of chemical composition and antioxidant potential of volatile oil from fresh, dried and cured turmeric (*Curcuma Longa*) rhizomes. *Industrial Crops and Products* 38(1): 124–131. http://dx.doi.org/10.1016/j.indcrop.2012.01.014.

Lewinsohn, E., F. Schalechet, J. Wilkinson, K. Matsui, Y. Tadmor, K. Nam, O. Amar, et al. 2001. Enhanced levels of the aroma and flavor compound. *Plant Physiology* 127: 1256–1265.

Lewinsohn, E., I. Ziv-raz, N. Dudai, Y. Tadmor, E. Lastochkin, O. Larkov, D. Chaimovitsh, et al. 2000. Biosynthesis of estragole and methyl-eugenol in sweet basil (*Ocimum Basilicum* L). developmental and chemotypic association of allylphenol o-methyltransferase activities. *Plant Science* 160: 27–35. https://doi.org/10.1016/S0168-9452(00)00357-5

Monteiro, O.S., A.G. Souza, L.E.B. Soledade, N. Queiroz, A.L. Souza, V.E. Mouchrek Filho, and A.F.F. Vasconcelos. 2011. Chemical evaluation and thermal analysis of the essential oil from the fruits of the vegetable species *Pimenta Dioica* Lindl. *Journal of Thermal Analysis and Calorimetry* 106(2): 595–600. doi: 10.1007/s10973-011-1438-4

Narasimha Prasad, B.C., V. Kumar, H.B. Gururaj, R. Parimalan, P. Giridhar, and R. G.A. 2006. Characterization of capsaicin synthase and identification of its gene (csy1) for pungency factor capsaicin in pepper (*Capsicum Sp.*). *Proceedings of the National Academy of Sciences of the United States of America* 103(36): 13315–13320. https://doi.org/10.1073/pnas.0605805103

Nielsen, G.S., and L. Poll. 2004. Determination of odor active aroma compounds in freshly cut leek (*Allium Ampeloprasum* Var. Bulga) and in long-term stored frozen unblanched and blanched leek slices by gas chromatography olfactometry analysis. *Journal of Agricultural and Food Chemistry* 52(6): 1642–1646. doi: 10.1021/jf030682k

Oa, M.P.W., C.C. Eady, T. Kamoi, M. Kato, N.G. Porter, S. Davis, and M. Shaw. 2008. Silencing onion lachrymatory factor synthase causes a significant change in the sulfur secondary. *Plant Physiology* 147(8): 2096–2106. doi: 10.1104/pp.108.123273. Organica, C., D. Chimica, U. Perugia, V. Elce, B. Vegetale, B.X.X. Giugno, and U. Chieti-pescara. 2004. Volatile compounds in different cultivars of *Apium Graveolens* L . *Italian Journal of Food Science* 16(4): 477–483.

Oroojalian, F., R. Kasra-Kermanshahi, M. Azizi, and M.R. Bassami. 2010. Phytochemical composition of the essential oils from three *Apiaceae* species and their antibacterial effects on food-borne pathogens. *Food Chemistry* 120(3): 765–770. http://dx.doi.org/10.1016/j.foodchem.2009.11.008.

Pino, J.A., V. Fuentes, and M.T. Correa. 2001. Volatile constituents of chinese chive (*Allium Tuberosum* Rottl. Ex Sprengel) and Rakkyo (*Allium Chinense* G. Don). *Journal of Agricultural and Food Chemistry* 49(3): 1328–1330.doi: 10.1021/jf9907034

Politeo, O., M. Jukic, and M. Milos. 2006. Chemical composition and antioxidant capacity of free volatile aglycones from basil (*Ocimum Basilicum* L.) compared with its essential oil. *Food Chemistry* 101(1): 379–385. https://doi.org/10.1016/j.foodchem.2006.01.045

Potter, T.L. 1996. Essential oil composition of cilantro. *Journal of Agricultural and Food Chemistry* 44(7): 1824–1826. doi: 10.1021/jf950814c

Ramirez-Ahumada, M. del C., B.N. Timmermann, and D.R. Gang. 2006. Biosynthesis of curcuminoids and gingerols in turmeric (*Curcuma Longa*) and ginger (*Zingiber Officinale*): identification of curcuminoid synthase and hydroxycinnamoyl-CoA thioesterases. *Phytochemistry* 67(18): 2017–2029. https://doi.org/10.1016/j.phytochem.2006.06.028

Sellami, I.H., W.A. Wannes, I. Bettaieb, S. Berrima, T. Chahed, B. Marzouk, and F. Limam. 2011. Qualitative and quantitative changes in the essential oil of *Laurus Nobilis* L. leaves as affected by different drying methods. *Food Chemistry* 126(2): 691–697. http://dx.doi.org/10.1016/j.foodchem.2010.11.022.

Shaw, M.L., M.D. Pither-joyce, and J.A. Mccallum. 2005. Purification and cloning of a γ-glutamyl transpeptidase from Onion (*Allium cepa*). *Phytochemistry* 66(2005): 515–522. doi: 10.1016/j.phytochem.2005.01.017

Shimada, T., T. Endo, H. Fujii, A. Rodríguez, L. Peña, and M. Omura. 2014. Characterization of three linalool synthase genes from *Citrus unshiu* Marc. and analysis of linalool-mediated resistance against *Xanthomonas citri* Subsp. Citri and *Penicilium italicum* in citrus leaves and fruits. *Plant Science* 229: 154–166. doi: 10.1016/j.plantsci.2014.09.008

Singh, G., I. Kapoor, P. Singh, C. Heluani, and C. Catalan. 2008. Chemical composition and antioxidant potential of essential oil and oleoresins from anise seeds (*Pimpinella Anisum* L.). *International Journal of Essential Oil Therapeutics* 2(1): 122–130.

Singh, S., I.P.S. Kapoor, G. Singh, C. Schuff, M.P. De Lampasona, and C.A.N. Catalan. 2013. Chemistry, antioxidant and antimicrobial potentials of white pepper (*Piper Nigrum* L.) essential oil and oleoresins. *Proceedings of the National Academy of Sciences, India Section B: Biological Sciences* 83(3): 357–366. http://link.springer.com/10.1007/s40011-012-0148-4.

Szumny, A., A. Figiel, A. Gutiérrez-Ortíz, and Á.A. Carbonell-Barrachina. 2010. Composition of rosemary essential oil (*Rosmarinus Officinalis*) as affected by drying method. *Journal of Food Engineering* 97(2): 253–260. http://dx.doi.org/10.1016/j.jfoodeng.2009.10.019.

Thomson, S.J., P. Rippon, C. Butts, S. Olsen, M. Shaw, N. Joyce and C.C. Eady. 2013 Inhibition of platelet activation by lachrymatory factor synthase (LFS)-silenced (tearless) onion juice. Journal of Agriculture and Food Chemistry 61(44): 10574-10581. <https://doi.org/10.1021/jf4030213>

Urano, Y., T. Manabe, M. Noji, and K. Saito. 2000. Molecular cloning and functional characterization of CDNAs encoding cysteine synthase and serine acetyltransferase that may be responsible for high cellular cysteine content in *Allium tuberosum*. *Gene* 257(2): 269–277.

Vera, R.R., and J. Chane-Ming. 1999. Chemical composition of the essential oil of marjoram (*Origanum Majorana* L.) from reunion island. *Food Chemistry* 66(2): 143–145. https://doi.org/10.1016/S0308-8146(98)00018-1

Wang, S., S. Zhang, A. Xiao, M. Rasmussen, C. Skidmore, and J. Zhan. 2015. Metabolic engineering of *Escherichia coli* for the biosynthesis of various phenylpropanoid derivatives. *Metabolic Engineering* 29: 153–159. http://dx.doi.org/10.1016/j.ymben.2015.03.011.

Xiong, D., S. Lu, J. Wu, C. Liang, W. Wang, W. Wang, J.M. Jin, and S.Y. Tang. 2017. Improving key enzyme activity in phenylpropanoid pathway with a designed biosensor. *Metabolic Engineering* 40(11): 115–123. http://dx.doi.org/10.1016/j.ymben.2017.01.006.

Yang, X. 2008. Aroma constituents and alkylamides of red and green Huajiao (*Zanthoxylum Bungeanum* and *Zanthoxylum Schinifolium*). *Journal of Agricultural and Food Chemistry* 56(5): 1689–1696. doi: 10.1021/jf0728101

Yang, Z., W. Yang, Q. Peng, Q. He, Y. Feng, S. Luo, and Z. Yu. 2009. Volatile phytochemical composition of rhizome of ginger after extraction by headspace solid-phase microextraction, petrol ether extraction and steam distillation extraction. *Bangladesh Journal of Pharmacology* 4(2): 136–143. doi: 10.3329/bjp.v4i2.3232
